# Supplementary material for: The feasibility of reaching gigatonne scale CO2 storage by mid-century
Source: Research Square preprint supplement (doi:10.21203/rs.3.rs-4011559/v1), 2024-03-18
Supplement: Supplementary file 1 [file 2027e7adda156a9fde408694.xlsx]

## Sheet: Title 
The feasibility of reaching gigatonne scale CO2 storage by mid-century
Yuting Zhanga*, Christopher Jacksona, and Samuel Krevora
a Department of Earth Science and Engineering, Imperial College London, Exhibition Road, London, SW7 2BX, UK
*Email: yuting.zhang16@imperial.ac.uk

## Sheet: README
Planned and existing CCS projects published in 2022 across ten global storage regions

## Sheet: Storage Resource Assessments
Country	Storage resource estimate (Gt)	Source	Storage resource Assessment Saline Aquifer	Storage Resource Assessment Depleted HC fields	% of estimate that is storing CO2 within saline aquifers
China	403 Gt				100
Canada	404 Gt	OGCI	Volumetric	They are not injecting CO2 in depleted HC so it is not considered as most fields have undergon several recovery hence already flooded with water and leaves little pore voume for CO2	97
Australia	502.4 Gt	OGCI	Volumetric probabilitics	Not defined	97
US	506 Gt		Dynamic		97
UK	78 Gt	OGCI		Voidage Replacement (some sites with simulation)	90
EU (norway for storage)	94 Gt	OGCI	Generally volumetric with some detailed dynamic model used where data was available for a few sites	Voidage Replacement	85
South Korea	203.4 Gt	OGCI	Volumetric		99.9
Indonesia	15.86 Gt	OGCI	Volumetric	Voidage Replacement	89
Thailand	10.471 Gt	OGCI
Middle East	17.672 Gt	OGCI

## Sheet: UK
Year	Storage Rate (Mt/Year)	Cumulative Storage (Mt)	Cumulative Storage (Gt)		Facility	2024	2025	2026	2027	2028	2029	2030										1
2024	3	3			CALEDONIA CLEAN ENERGY	3	3	3	3	3	3	3
2025	35.6	38.6			East coast cluster		27	27	27	27	27	27
2026	37.4	76			STANLOW REFINERY LOW CARBON HYDROGEN PLANT		0.6	0.6	0.6	0.6	0.6	0.6
2027	45.4	121.4			ACORN DIRECT AIR CAPTURE FACILITY			1	1	1	1	1
2028	45.4	166.8			HYNET NORTH WEST - HANSON CEMENT CCS			0.8	0.8	0.8	0.8	0.8
2029	45.4	212.2			DRAX BECCS PROJECT				8	8	8	8
2030	45.4	257.6	0.2576		ACORN		5	5	5	5	5	5
						3	35.6	37.4	45.4	45.4	45.4	45.4

## Sheet: US
Year	Storage Rate (Mt/Year)	Cumulative Storage (Mt)	Cumulative Storage (Gt)		Facility	1972	1973	1974	1975	1976	1977	1978	1979	1980	1981	1982	1983	1984	1985	1986	1987	1988	1989	1990	1991	1992	1993	1994	1995	1996	1997	1998	1999	2000	2001	2002	2003	2004	2005	2006	2007	2008	2009	2010	2011	2012	2013	2014	2015
1972	0.5	0.5			TERRELL NATURAL GAS PROCESSING PLANT (FORMERLY VAL VERDE NATURAL GAS PLANTS)	0.5	0.5	0.5	0.5	0.5	0.5	0.5	0.5	0.5	0.5	0.5	0.5	0.5	0.5	0.5	0.5	0.5	0.5	0.5	0.5	0.5	0.5	0.5	0.5	0.5	0.5	0.5	0.5	0.5	0.5	0.5	0.5	0.5	0.5	0.5	0.5	0.5	0.5	0.5	0.5	0.5	0.5	0.5	0.5
1973	0.5	1			ENID FERTILIZER											0.2	0.2	0.2	0.2	0.2	0.2	0.2	0.2	0.2	0.2	0.2	0.2	0.2	0.2	0.2	0.2	0.2	0.2	0.2	0.2	0.2	0.2	0.2	0.2	0.2	0.2	0.2	0.2	0.2	0.2	0.2	0.2	0.2	0.2
1974	0.5	1.5			SHUTE CREEK GAS PROCESSING PLANT															7	7	7	7	7	7	7	7	7	7	7	7	7	7	7	7	7	7	7	7	7	7	7	7	7	7	7	7	7	7
1975	0.5	2			GREAT PLAINS SYNFUELS PLANT AND WEYBURN-MIDALE CORE ENERGY CO2-EOR																													3	3	3	3	3	3	3	3	3	3	3	3	3	3	3	3
1976	0.5	2.5			CORE ENERGY CO2-EOR																																0.35	0.35	0.35	0.35	0.35	0.35	0.35	0.35	0.35	0.35	0.35	0.35	0.35
1977	0.5	3			ARKALON CO2 COMPRESSION FACILITY																																						0.28	0.28	0.28	0.28	0.28	0.28	0.28
1978	0.5	3.5			CENTURY PLANT																																							5	5	5	5	5	5
1979	0.5	4			BONANZA BIOENERGY CCUS EOR																																									0.1	0.1	0.1	0.1
1980	0.5	4.5			AIR PRODUCTS STEAM METHANE REFORMER																																										1	1	1
1981	0.5	5			COFFEYVILLE GASIFICATION PLANT																																										0.9	0.9	0.9
1982	0.7	5.7			PCS NITROGEN																																										0.3	0.3	0.3
1983	0.7	6.4			ILLINOIS INDUSTRIAL CARBON CAPTURE AND STORAGE
1984	0.7	7.1			RED TRAIL ENERGY CCS
1985	0.7	7.8			1POINTFIVE DIRECT AIR CAPTURE FACILITY
1986	7.7	15.5			LOUISIANA CLEAN ENERGY COMPLEX
1987	7.7	23.2			WABASH CO2 SEQUESTRATION
1988	7.7	30.9			NORTHERN DELAWARE BASIN CCS
1989	7.7	38.6			ABERDEEN BIOREFINERY CARBON CAPTURE AND STORAGE
1990	7.7	46.3			ATKINSON BIOREFINERY CARBON CAPTURE AND STORAGE
1991	7.7	54			CASSELTON BIOREFINERY CARBON CAPTURE AND STORAGE
1992	7.7	61.7			CENTRAL CITY BIOREFINERY CARBON CAPTURE AND STORAGE
1993	7.7	69.4			FEDERATED CO-OPERATIVES LIMITED (ETHANOL)
1994	7.7	77.1			GOLDFIELD BIOREFINERY CARBON CAPTURE AND STORAGE
1995	7.7	84.8			GRAND JUNCTION BIOREFINERY CARBON CAPTURE AND STORAGE
1996	7.7	92.5			GRANITE FALLS BIOREFINERY CARBON CAPTURE AND STORAGE
1997	7.7	100.2			HERON LAKE BIOREFINERY CARBON CAPTURE AND STORAGE
1998	7.7	107.9			HURON BIOREFINERY CARBON CAPTURE AND STORAGE
1999	7.7	115.6			LAMBERTON BIOREFINERY CARBON CAPTURE AND STORAGE
2000	10.7	126.3			LAWLER BIOREFINERY CARBON CAPTURE AND STORAGE
2001	10.7	137			MARCUS BIOREFINERY CARBON CAPTURE AND STORAGE
2002	10.7	147.7			MASON CITY BIOREFINERY CARBON CAPTURE AND STORAGE
2003	11.05	158.75			MERRILL BIOREFINERY CARBON CAPTURE AND STORAGE
2004	11.05	169.8			MINA BIOREFINERY CARBON CAPTURE AND STORAGE
2005	11.05	180.85			NEVADA BIOREFINERY CARBON CAPTURE AND STORAGE
2006	11.05	191.9			NORFOLK BIOREFINERY CARBON CAPTURE AND STORAGE
2007	11.05	202.95			ONIDA BIOREFINERY CARBON CAPTURE AND STORAGE
2008	11.05	214			OTTER TAIL BIOREFINERY CARBON CAPTURE AND STORAGE
2009	11.33	225.33			PLAINVIEW BIOREFINERY CARBON CAPTURE AND STORAGE
2010	16.33	241.66			REDFIELD BIOREFINERY CARBON CAPTURE AND STORAGE
2011	16.33	257.99			SAN JUAN GENERATING STATION CARBON CAPTURE
2012	16.43	274.42			SHENANDOAH BIOREFINERY CARBON CAPTURE AND STORAGE
2013	18.63	293.05			SIOUX CENTER BIOREFINERY CARBON CAPTURE AND STORAGE
2014	18.63	311.68			STEAMBOAT ROCK BIOREFINERY CARBON CAPTURE AND STORAGE
2015	18.63	330.31			SUPERIOR BIOREFINERY CARBON CAPTURE AND STORAGE
2016	18.63	348.94			WATERTOWN BIOREFINERY CARBON CAPTURE AND STORAGE
2017	19.63	368.57			WENTWORTH BIOREFINERY CARBON CAPTURE AND STORAGE
2018	19.63	388.2			WOOD RIVER BIOREFINERY CARBON CAPTURE AND STORAGE
2019	19.63	407.83			YORK BIOREFINERY CARBON CAPTURE AND STORAGE
2020	19.63	427.46			COYOTE CLEAN POWER PROJECT
2021	19.63	447.09			LAKE CHARLES METHANOL
2022	21.74	468.83			ONE EARTH ENERGY FACILITY CARBON CAPTURE
2023	22.47	491.3			PROJECT TUNDRA
2024	41.46	532.76			CAL CAPTURE
2025	82.07	614.83			GERALD GENTLEMAN STATION CARBON CAPTURE
2026	90.67	705.5			PLANT DANIEL CARBON CAPTURE
2027	94.67	800.17			PRAIRIE STATE GENERATING STATION CARBON CAPTURE
2028	94.67	894.84			MIDWEST AGENERGY BLUE FLINT ETHANOL CCS
2029	94.67	989.51			PROJECT INTERSEQT - HEREFORD ETHANOL PLANT
2030	94.67	1084.18	1.08418		PROJECT INTERSEQT - PLAINVIEW ETHANOL PLANT
					AEMETIS
					CARBON TERRAVAULT I PROJECT
					CLEAN ENERGY SYSTEMS CARBON NEGATIVE ENERGY PLANT - CENTRAL VALLEY
					DRY FORK INTEGRATED COMMERCIAL CARBON CAPTURE AND STORAGE (CCS)
					ILLINOIS ALLAM-FETVEDT CYCLE POWER PLANT
					MENDOTA BECCS
					NEXTDECADE RIO GRANDE LNG CCS
					THE ILLINOIS CLEAN FUELS PROJECT
					VELOCYS’ BAYOU FUELS NEGATIVE EMISSION PROJECT
					G2 NET-ZERO LNG
					LAFARGEHOLCIM CEMENT CARBON CAPTURE
					Total	0.5	0.5	0.5	0.5	0.5	0.5	0.5	0.5	0.5	0.5	0.7	0.7	0.7	0.7	7.7	7.7	7.7	7.7	7.7	7.7	7.7	7.7	7.7	7.7	7.7	7.7	7.7	7.7	10.7	10.7	10.7	11.05	11.05	11.05	11.05	11.05	11.05	11.33	16.33	16.33	16.43	18.63	18.63	18.63
[truncated: 15 more columns]

## Sheet: Europe
Year	Storage Rate (Mt/Year)	Cumulative Storage (Mt)	Cumulative Storage (Gt)		Country	Facility	1992	1993	1994	1995	1996	1997	1998	1999	2000	2001	2002	2003	2004	2005	2006	2007	2008	2009	2010	2011	2012	2013	2014	2015	2016	2017	2018	2019	2020	2021	2022	2023	2024	2025	2026	2027	2028	2029	2030
1992	0.16	0.16			Hungry	MOL SZANK FIELD CO2 EOR	0.16	0.16	0.16	0.16	0.16	0.16	0.16	0.16	0.16	0.16	0.16	0.16	0.16	0.16	0.16	0.16	0.16	0.16	0.16	0.16	0.16	0.16	0.16	0.16	0.16	0.16	0.16	0.16	0.16	0.16	0.16	0.16	0.16	0.16	0.16	0.16	0.16	0.16	0.16
1993	0.16	0.32			Norway	SLEIPNER CO2 STORAGE					1	1	1	1	1	1	1	1	1	1	1	1	1	1	1	1	1	1	1	1	1	1	1	1	1	1	1	1	1	1	1	1	1	1	1
1994	0.16	0.48			Norway	SNOHVIT CO2 STORAGE																	0.7	0.7	0.7	0.7	0.7	0.7	0.7	0.7	0.7	0.7	0.7	0.7	0.7	0.7	0.7	0.7	0.7	0.7	0.7	0.7	0.7	0.7	0.7
1995	0.16	0.64			Norway	NORCEM BREVIK - CEMENT PLANT																																	0.4	0.4	0.4	0.4	0.4	0.4	0.4
1996	1.16	1.8			Norway	HAFSLUND OSLO CELSIO- KLEMETSRUD WASTE TO ENERGY PLANT NORTH FIELD EAST PROJECT (NFE) CCS																																		0.4	0.4	0.4	0.4	0.4	0.4
1997	1.16	2.96			Netherlands	AIR LIQUIDE REFINERY ROTTERDAM CCS																																	0.8	0.8	0.8	0.8	0.8	0.8	0.8
1998	1.16	4.12
1999	1.16	5.28			Netherlands	SHELL REFINERY ROTTERDAM CCS																																	1.4	1.4	1.4	1.4	1.4	1.4	1.4
2000	1.16	6.44			Denmark	COPENHILL (AMAGER BAKKE) WASTE TO ENERGY CCS																																	0.5	0.5	0.5	0.5	0.5	0.5	0.5
2001	1.16	7.6			Sweden	STOCKHOLM EXERGI BECCS																																		0.8	0.8	0.8	0.8	0.8	0.8
2002	1.16	8.76			Belgium	ANTWERP@C - BASF ANTWERP CCS																																							1.42
2003	1.16	9.92			Netherlands	HYDROGEN 2 MAGNUM (H2M)																																	2	2	2	2	2	2	2
2004	1.16	11.08			Netherlands	YARA SLUISKIL																																		0.8	0.8	0.8	0.8	0.8	0.8
2005	1.16	12.24			Sweden	PREEM REFINERY CCS																																		0.5	0.5	0.5	0.5	0.5	0.5
2006	1.16	13.4			France	K6																																					0.8	0.8	0.8
2007	1.16	14.56			Norway	BARENTS BLUE																																		2	2	2	2	2	2
2008	1.86	16.42			Finland	SHARC PROJECT																																		0.4	0.4	0.4	0.4	0.4	0.4
2009	1.86	18.28				Total	0.16	0.16	0.16	0.16	1.16	1.16	1.16	1.16	1.16	1.16	1.16	1.16	1.16	1.16	1.16	1.16	1.86	1.86	1.86	1.86	1.86	1.86	1.86	1.86	1.86	1.86	1.86	1.86	1.86	1.86	1.86	1.86	6.96	11.86	11.86	11.86	12.66	12.66	14.08
2010	1.86	20.14
2011	1.86	22
2012	1.86	23.86
2013	1.86	25.72
2014	1.86	27.58
2015	1.86	29.44
2016	1.86	31.3
2017	1.86	33.16
2018	1.86	35.02
2019	1.86	36.88
2020	1.86	38.74
2021	1.86	40.6
2022	1.86	42.46
2023	1.86	44.32
2024	6.96	51.28
2025	11.86	63.14
2026	11.86	75
2027	11.86	86.86
2028	12.66	99.52
2029	12.66	112.18
2030	14.08	126.26	0.12626

## Sheet: South Korea
Year	Storage Rate (Mt/Year)	Cumulative Storage (Mt)				Facility	2025	2026	2027	2028	2029	2030
2025	1	1				KOREA-CCS 1 & 2	1	1	1	1	1	1
2026	1	2
2027	1	3
2028	1	4
2029	1	5
2030	1	6	0.006

## Sheet: China
Year	Storage Rate (Mt/Year)	Cumulative Storage (Mt)				Facility	2015	2016	2017	2018	2019	2020	2021	2022	2023	2024	2025	2026	2027	2028	2029	2030
2015	0.1	0.1				KARAMAY DUNHUA OIL TECHNOLOGY CCUS EOR	0.1	0.1	0.1	0.1	0.1	0.1	0.1	0.1	0.1	0.1	0.1	0.1	0.1	0.1	0.1	0.1
2016	0.1	0.2				CNPC JILIN OIL FIELD CO2 EOR				0.6	0.6	0.6	0.6	0.6	0.6	0.6	0.6	0.6	0.6	0.6	0.6	0.6
2017	0.1	0.3				SINOPEC QILU-SHENGLI CCUS								1	1	1	1	1	1	1	1	1
2018	0.7	1				CNOOC SOUTH CHINA SEA OFFSHORE CCS									0.3	0.3	0.3	0.3	0.3	0.3	0.3	0.3
2019	0.7	1.7				GUODIAN TAIZHOU POWER STATION CARBON CAPTURE									0.3	0.3	0.3	0.3	0.3	0.3	0.3	0.3
2020	0.7	2.4				HUANENG LONGDONG ENERGY BASE CARBON CAPTURE AND STORAGE									1.5	1.5	1.5	1.5	1.5	1.5	1.5	1.5
2021	0.7	3.1				SINOPEC SHENGLI POWER PLANT CCS											1	1	1	1	1	1
2022	1.7	4.8				Total	0.1	0.1	0.1	0.7	0.7	0.7	0.7	1.7	3.8	3.8	4.8	4.8	4.8	4.8	4.8	4.8
2023	3.8	8.6
2024	3.8	12.4
2025	4.8	17.2
2026	4.8	22
2027	4.8	26.8
2028	4.8	31.6
2029	4.8	36.4
2030	4.8	41.2	0.0412
Year	China oil production in million tonnes
1965	11.31
1966	14.55
1967	13.88
1968	15.99
1969	21.74
1970	30.65
1971	39.41
1972	45.67
1973	53.61
1974	64.85
1975	77.06
1976	87.16
1977	93.64
1978	104.05
1979	106.15
1980	105.95
1981	101.22
1982	102.12
1983	106.07
1984	114.61
1985	124.9
1986	130.69
1987	134.14
1988	137.05
1989	137.64
1990	138.31
1991	140.99
1992	142.04
1993	144.03
1994	146.08
1995	149.02
1996	158.52
1997	160.13
1998	160.18
1999	160.22
2000	162.62
2001	164.83
2002	166.866
2003	169.585
2004	174.051
2005	181.353
2006	184.766
2007	186.318
2008	190.44
2009	189.49
2010	203.014
2011	202.876
2012	207.478
2013	209.959
2014	211.429
2015	214.56
2016	199.685
2017	191.506
2018	189.324
2019	191.628
2020	194.769
2021	198.881
2021	0.0239098
2011-21	-0.00198661
2021	0.0471129

## Sheet: Middle East
Year	Storage Rate (Mt/Year)	Cumulative Storage (Mt)				Facility	2015	2016	2017	2018	2019	2020	2021	2022	2023	2024	2025	2026	2027	2028	2029	2030
2015	0.8	0.8				UTHMANIYAH CO2-EOR DEMONSTRATION	0.8	0.8	0.8	0.8	0.8	0.8	0.8	0.8	0.8	0.8	0.8	0.8	0.8	0.8	0.8	0.8
2016	1.6	2.4				ABU DHABI CCS (PHASE 1 BEING EMIRATES STEEL INDUSTRIES)		0.8	0.8	0.8	0.8	0.8	0.8	0.8	0.8	0.8	0.8	0.8	0.8	0.8	0.8	0.8
2017	1.6	4				QATAR LNG CCS					2.2	2.2	2.2	2.2	2.2	2.2	2.2	2.2	2.2	2.2	2.2	2.2
2018	1.6	5.6				NORTH FIELD EAST PROJECT (NFE) CCS											1	1	1	1	1	1
2019	3.8	9.4				ABU DHABI CCS PHASE 2: NATURAL GAS PROCESSING PLANT											2.3	2.3	2.3	2.3	2.3	2.3
2020	3.8	13.2					0.8	1.6	1.6	1.6	3.8	3.8	3.8	3.8	3.8	3.8	7.1	7.1	7.1	7.1	7.1	7.1
2021	3.8	17
2022	3.8	20.8
2023	3.8	24.6
2024	3.8	28.4
2025	7.1	35.5
2026	7.1	42.6
2027	7.1	49.7
2028	7.1	56.8
2029	7.1	63.9
2030	7.1	71	0.071

## Sheet: Australia
Year	Storage Rate (Mt/Year)	Cumulative Storage (Mt)				Facility	2019	2020	2021	2022	2023	2024	2025	2026	2027	2028	2029	2030
2019	4	4				GORGON CARBON DIOXIDE INJECTION	4	4	4	4	4	4	4	4	4	4	4	4
2020	4	8				SANTOS COOPER BASIN CCS PROJECT					1.7	1.7	1.7	1.7	1.7	1.7	1.7	1.7
2021	4	12				BRIDGEPORT ENERGY MOONIE CCUS PROJECT					0.2	0.2	0.2	0.2	0.2	0.2	0.2	0.2
2022	4	16				SOUTH EAST AUSTRALIA CARBON CAPTURE HUB							2	2	2	2	2	2
2023	5.9	21.9				INPEX CCS PROJECT DARWIN								7	7	7	7	7
2024	5.9	27.8					4	4	4	4	5.9	5.9	7.9	14.9	14.9	14.9	14.9	14.9
2025	7.9	35.7
2026	14.9	50.6
2027	14.9	65.5
2028	14.9	80.4
2029	14.9	95.3
2030	14.9	110.2	0.1102
	200
	13.4228

[truncated: 3 more sheets: Canada, Indonesia, Thailand]
